# Supplementary material for: Selective etching of metastable phase induced an efficient CuIn0.7Ga0.3S2nano-photocathode for solar water splitting
Source: Royal Society of Chemistry journal article supplement (doi:10.1039/c5ta01259g), 2015-01-01
Supplement: c5ta01259g1.pdf [file c5ta01259g1.pdf]

## Supporting Information

### Selective etching of metastable phase induced an efficient $\text{CuIn}_{0.7}\text{Ga}_{0.3}\text{S}_2$ nano-photocathode for solar water splitting

Zhongjie Guan,<sup>a</sup> Wenjun Luo,<sup>\*bc</sup> Jianyong Feng,<sup>a</sup> Qiuchen Tao,<sup>c</sup> Yao Xu,<sup>c</sup> Xin Wen,<sup>c</sup>  
Gao Fu<sup>c</sup> and Zhigang Zou<sup>\*c</sup>

<sup>a</sup>College of Engineering and Applied Science, Nanjing University, Nanjing 210093, P.R. China

<sup>b</sup>Key Laboratory of Flexible Electronics (KLOFE) & Institute of Advanced Materials (IAM), Jiangsu National Synergistic Innovation Center for Advanced Materials (SICAM), Nanjing Tech University (NanjingTech), 30 South Puzhu Road, Nanjing 211816, P.R. China

<sup>c</sup>Eco-materials and Renewable Energy Research Center (ERERC), National Laboratory of Solid State Microstructures and Department of Physics, Nanjing University, Nanjing 210093, P.R. China

\*To whom correspondence should be addressed,

E-mail: iamwjluo@njtech.edu.cn, zgrou@nju.edu.cn

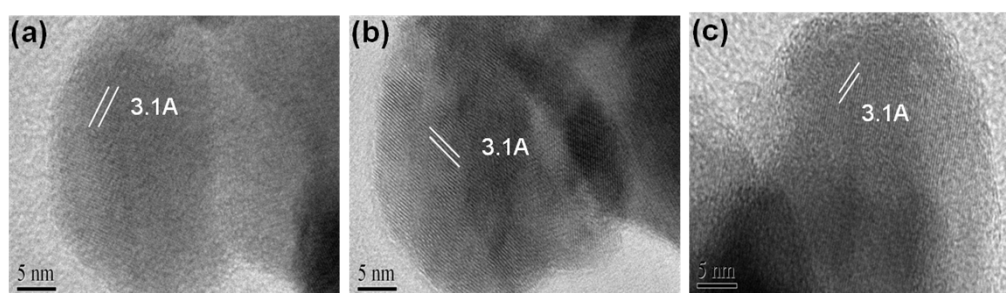

**Fig. S1** High-resolution TEM images of the  $\text{CuIn}_{0.7}\text{Ga}_{0.3}\text{S}_2$  nanoparticles before etching (a), 0.4 V etching (b), and 0.8 V etching (c).

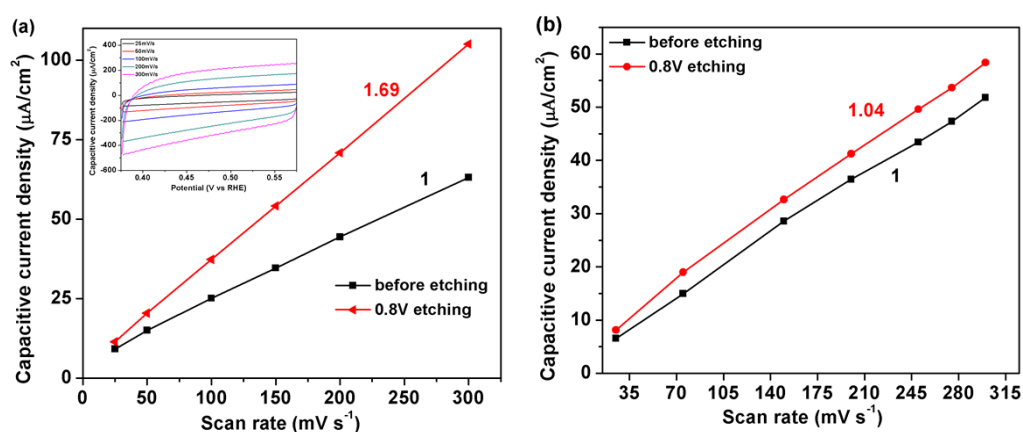

**Fig. S2** (a) Relative electrochemical active area measurement of  $\text{CuIn}_{0.7}\text{Ga}_{0.3}\text{S}_2$  photocathodes before and after 0.8 V etching: linear relationship between the capacitive current and scan rate for the  $\text{CuIn}_{0.7}\text{Ga}_{0.3}\text{S}_2$  photocathodes before and after 0.8 V etching. The inset is the example cyclic voltammograms showing the capacitive current for the  $\text{CuIn}_{0.7}\text{Ga}_{0.3}\text{S}_2$  photocathodes after 0.8 V etching at different scan rate from 25 to 300  $\text{mV s}^{-1}$ . (b) Plot showing the linear relationship between the capacitive current and scan rate for the  $\text{Pt/CdS/CuIn}_{0.7}\text{Ga}_{0.3}\text{S}_2$  electrode before and after 0.8 V etching. The relative electrochemical surface area was determined from capacitance measurements by cyclic voltammetry scan between 0.38  $V_{\text{RHE}}$  and 0.58  $V_{\text{RHE}}$  in a  $\text{Na}_2\text{SO}_4$  aqueous solution (0.5 mol/L, pH = 6.5) in the dark. The scan rates were changed from 25 to 300  $\text{mV s}^{-1}$ .

**Table S1.** Surface atomic ratios of the  $\text{CuIn}_{0.7}\text{Ga}_{0.3}\text{S}_2$  photocathodes before and after 0.8 V etching by XPS.

| Samples        | Atomic ratio |       |
|----------------|--------------|-------|
|                | Cu/(In+Ga)   | In/Ga |
| before etching | 0.90         | 4.29  |
| 0.8V etching   | 1.61         | 5.20  |

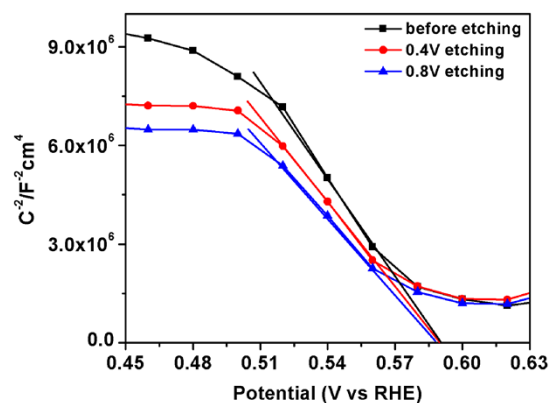

**Fig. S3** Mott–Schottky plots of the CuIn<sub>0.7</sub>Ga<sub>0.3</sub>S<sub>2</sub> photocathodes before and after etching with different potential ranges. The ac amplitude is 10 mV and the frequency is 200 Hz.

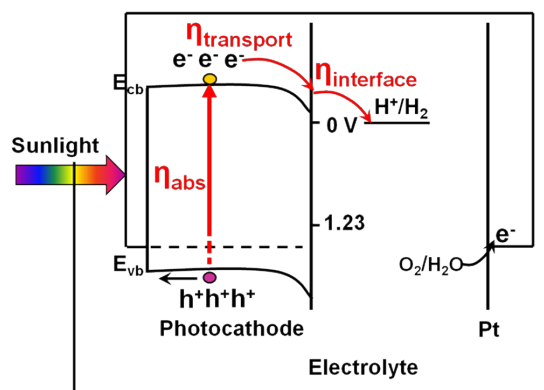

**Fig. S4** A schematic diagram of three fundamental processes of photo-generated carriers in a photocathode.

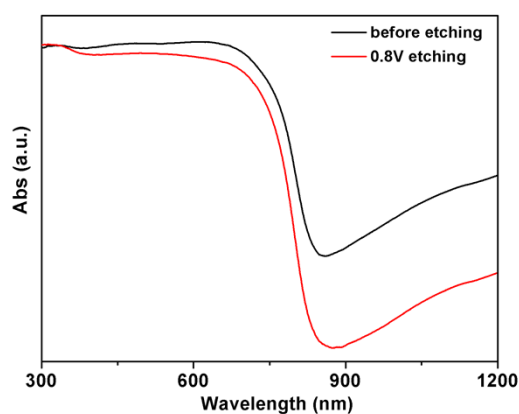

**Fig. S5** UV-vis absorption spectra of the CuIn<sub>0.7</sub>Ga<sub>0.3</sub>S<sub>2</sub> photocathodes before and after 0.8 V etching.

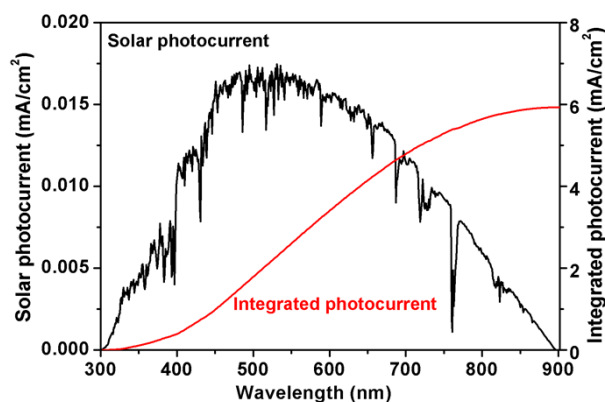

**Fig. S6** Integrated solar photocurrent at 0  $V_{\text{RHE}}$  by integrating IPCE with the standard solar spectrum.

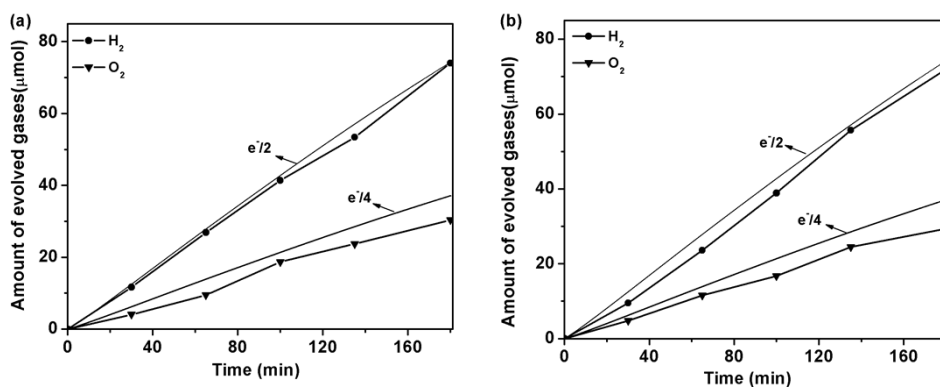

**Fig. S7** Time course of hydrogen gas evolution for the Pt/CdS/CuIn<sub>0.7</sub>Ga<sub>0.3</sub>S<sub>2</sub> photocathode (1 cm<sup>2</sup>) before etching at 0  $V_{\text{RHE}}$  (a) and 0.4 V etching (b). Light source: AM 1.5G simulated sunlight (100 mW cm<sup>-2</sup>). The theoretical number of hydrogen and oxygen molecules is denoted by  $e^-/2$  and  $e^-/4$  respectively.
